# Supplementary material for: Patterns of in situ Mineral Colonization by Microorganisms in a ~60°C Deep Continental Subsurface Aquifer
Source: Front Microbiol. 2020 Nov 19;11:536535. doi: 10.3389/fmicb.2020.536535 (PMC7711152; doi:10.3389/fmicb.2020.536535)
Supplement: Supplementary file 2 [file Data_Sheet_2.xlsx]

## Sheet: Sheet1
Sample_Name	Incubation	Substrate	Substrate_Group	DepthofSample (mbls)	Shannon Index	Chao1 Richness Estimate
SM-Calcite-Mid	1	calcite	Carbonate	752	3.19989	310.484
SM-Calcite-Top	1	calcite	Carbonate	752	3.35434	351.812
SM-GlassWool	1	silica	Silica	752	3.16863	277.2
SM-HidValDol-Mid	1	HVD	Carbonate	752	3.14627	360.385
SM-HidValDol-Top	1	HVD	Carbonate	752	3.3621	317.55
SM-LakeSeds-1	1	MS	Mixed_Silicic	752	3.3552	303.032
SM-LakeSeds-2	1	MS	Mixed_Silicic	752	3.17816	290.87
SM-SteelBalls	1	steel	Steel	752	3.18297	288.588
SM-WardDol-Mid	1	WD	Carbonate	752	2.86292	220.429
SM-WardDol-Top	1	WD	Carbonate	752	2.88389	218.375
SWM-BLM-BlCalc	blank	calcite	Control	NA	NA	NA
SWM-BLM-BlHVD	blank	HVD	Control	NA	NA	NA
SWM-BLM-BlLS	blank	MS	Control	NA	NA	NA
SWM-BLM-BlPrh	blank	pyrrhotite	Control	NA	NA	NA
SWM-BLM-BlPyr	blank	pyrite	Control	NA	NA	NA
SWM-BLM-BlWD	blank	WD	Control	NA	NA	NA
SWM-BLM-glass	3	silica	Silica	752	2.73443	176.5
SWM-BLM-glasspyr	3	silica	Silica	752	3.41152	291.156
SWM-BLM-HVD12	3	HVD	Carbonate	752	3.18573	187
SWM-BLM-HVD17	3	HVD	Carbonate	752	3.21037	156
SWM-BLM-LS15	3	MS	Mixed_Silicic	752	2.02807	50
SWM-BLM-LS4	3	MS	Mixed_Silicic	752	0.808775	25.5
SWM-BLM-Osp7	3	OrgSponge	Osponge	752	2.22502	106
SWM-BLM-prh11	3	pyrrhotite	pyrrhotite	752	3.2176	326.2
SWM-BLM-prh6	3	pyrrhotite	pyrrhotite	752	3.26659	297.146
SWM-BLM-pyr1	3	pyrite	pyrite	752	3.23595	214.647
SWM-BLM-pyr7	3	pyrite	pyrite	752	3.07742	245.667
SWM-BLM-sp1	3	PUR	PUR	200	3.60594	228.312
SWM-BLM-sp10	3	PUR	PUR	752	3.82882	343.5
SWM-BLM-sp7	3	PUR	PUR	579	3.23304	250.136
SWM-BLM-sp8	3	PUR	PUR	690	3.98379	326.5
SWM-BLM-sp9	3	PUR	PUR	720	3.84796	334.69
SWM-BLM-steel	3	steel	Steel	752	2.19999	81
SWM-BLM-WD13	3	WD	Carbonate	752	2.29769	37.5
SWM-BLM-WD16	3	WD	Carbonate	752	2.27991	77
SWM-BLM1-F4-glass-2	4	silica	Silica	752	2.85991	283.774
SWM-BLM1-F4-HVD6-2	4	HVD	Carbonate	752	2.48336	176.12
SWM-BLM1-F4-HVD7-2	4	HVD	Carbonate	752	3.12719	260.957
SWM-BLM1-F4-LS10-2	4	MS	Mixed_Silicic	752	3.34107	308.333
SWM-BLM1-F4-LS12-2	4	MS	Mixed_Silicic	752	2.81113	208.714
SWM-BLM1-F4-steel2-2	4	steel	Steel	752	3.10856	232.053
SWM-BLM1-F4-steel3-2	4	steel	Steel	752	3.34277	167
SWM-BLM1-F4-WD8-2	4	WD	Carbonate	752	2.53718	109.154
SWM-BLM1-F4-WD9-2	4	WD	Carbonate	752	2.70383	127.462
SWM-BLM1-F5-calc1	5	calcite	Carbonate	752	3.71801	253.167
SWM-BLM1-F5-calc2	5	calcite	Carbonate	752	3.91285	279.105
SWM-BLM1-F5-glass2	5	silica	Silica	752	3.48644	235.25
SWM-BLM1-F5-glass4	5	silica	Silica	752	3.53812	291.75
SWM-BLM1-F5-HVD1	5	HVD	Carbonate	752	3.55635	276.848
SWM-BLM1-F5-HVD2	5	HVD	Carbonate	752	3.54892	314.345
SWM-BLM1-F5-LCsteel	5	steel	Steel	752	4.03233	277.303
SWM-BLM1-F5-LS1	5	MS	Mixed_Silicic	752	3.48989	251.091
SWM-BLM1-F5-LS2	5	MS	Mixed_Silicic	752	3.40386	196.667
SWM-BLM1-F5-steel4	5	steel	Steel	752	3.55466	273.875
SWM-BLM1-F5-WD1	5	WD	Carbonate	752	3.72015	228.545
SWM-BLM1-F5-WD2	5	WD	Carbonate	752	3.49377	182
SWM-calc-2-5	2	calcite	Carbonate	752	3.74181	282.6
SWM-calc-2-6	2	calcite	Carbonate	752	3.77444	291.281
SWM-deep-1	2	water	Background	752	2.83047	53
SWM-deep-2	2	water	Background	752	2.65615	48
SWM-filter-1	2	filter	Background	579	3.51828	103.429
SWM-filter-2	2	filter	Background	752	3.63185	158.5
SWM-glass-2-9	2	silica	Silica	752	3.62975	280.12
SWM-glass-2-mid	2	silica	Silica	752	3.01011	277
SWM-glass-2-top	2	silica	Silica	752	3.83241	316.391
SWM-HVD-2-10	2	HVD	Carbonate	752	3.07719	186.545
SWM-HVD-2-12	2	HVD	Carbonate	752	3.85002	310.529
SWM-Lake-2-7	2	MS	Mixed_Silicic	752	3.31236	244.045
SWM-Lake-2-8	2	MS	Mixed_Silicic	752	3.29309	214.545
SWM-shallow	2	water	Background	579	2.79256	161.5
SWM-sponge-2-1	2	PUR	PUR	200	3.57702	186.368
SWM-sponge-2-15	2	PUR	PUR	752	3.57498	234.323
SWM-sponge-2-9	2	PUR	PUR	579	3.21955	243.444
SWM-steel-2-mid	2	steel	Steel	752	2.46989	100.545
SWM-steel-2-top	2	steel	Steel	752	2.29921	120.214
SWM-WD-2-3	2	WD	Carbonate	752	3.62746	247.833
SWM-WD-2-4	2	WD	Carbonate	752	3.3667	178.556
C-Q5lot0141505-Neg	blank	PCR_no_template	Control	NA	NA	NA
SWM-NegCtrl-1	blank	DNA_extraction	Control	NA	NA	NA
SWM-NegCtrl-2	blank	DNA_extraction	Control	NA	NA	NA
